# Supplementary material for: One-pot rota-crystallized hollownest-structured Ti–zeolite: a calcination-free and recyclable catalytic material
Source: Royal Society of Chemistry journal article supplement (doi:10.1039/c6sc01735e), 2016-01-01
Supplement: c6sc01735e1.pdf [file c6sc01735e1.pdf]

## Supporting Information

**Table S1** The elemental analysis results of Ti-HSZ precursor (synthesized at rotating rate of 56 rpm for 3.5 days) and Ti-HSZ catalyst.

| Sample           | N<br>(wt%) | C<br>(wt%) | H<br>(wt%) |
|------------------|------------|------------|------------|
| Ti-HSZ precursor | 1.67       | 7.53       | 1.57       |
| Ti-HSZ catalyst  | 0.16       | 0.89       | 0.30       |

**Table S2** Reuse of traditional Ti-MWW zeolite catalyst in the epoxidation of allyl chloride with hydrogen peroxide to epichlorohydrin under the present reaction and regeneration conditions.<sup>a</sup>

| Reused times | Conv.<br>(mol%) | Sele.<br>(%) |
|--------------|-----------------|--------------|
| Fresh        | 94.8            | 100          |
| 1            | 85.3            | 99.9         |
| 2            | 73.1            | 99.9         |
| 3            | 58.2            | 99.9         |
| 4            | 39.7            | 99.9         |

<sup>a</sup> Fresh catalyst is prepared by calcination at 773 K in air for 4 hours ;  
Reaction conditions: allyl chloride, 30 mmol; H<sub>2</sub>O<sub>2</sub>, 30 mmol; catalyst, 200 mg; acetone, 5 ml, reaction temperature, 333 K; reaction time, 8 h;  
Regeneration: the used catalyst (1 g) was washed by 60 ml of H<sub>2</sub>O<sub>2</sub> solution (30 g 30% H<sub>2</sub>O<sub>2</sub> in 30 g ethanol) at 343 K for 12 h. The solid catalyst was recovered by filtration and dried at 353 K for 6 h for next use.

## Captions:

**Figure S1** Three hydrothermal crystallization modes: (a) static, (b) stirring, and (c) rotating in this work.

**Figure S2** Crystallization apparatus in this work.

**Figure S3** Characterization of Ti-MWW sample synthesized by conventional stirring crystallization mode: (a) SEM image, and (b) XRD pattern.

**Figure S4** XRD patterns of Ti-HSZ catalyst synthesized at different rotating rates for 3.5 days (a) and SEM images of Ti-HSZ catalyst synthesized at rotating rates of 28 rpm (b).

**Figure S5** FTIR spectra of Ti-HSZ catalysts synthesized at different rotating rates.

**Figure S6** UV-vis spectra of Ti-HSZ catalysts crystallized at different rotating rates.

**Figure S7** Recycling tests over traditional Ti-MWW catalyst. (Reaction conditions: allyl chloride, 30 mmol; H<sub>2</sub>O<sub>2</sub>, 30 mmol; catalyst, 200 mg; acetone, 5 ml; reaction temperature, 333 K; reaction time, 8 h.)

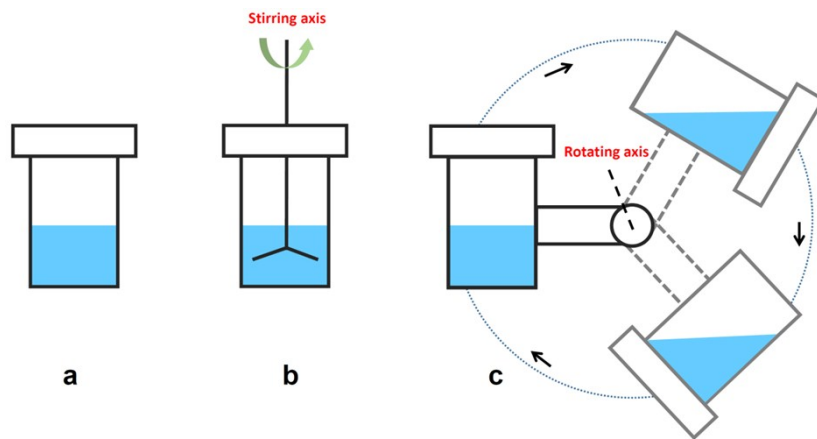

Figure S1

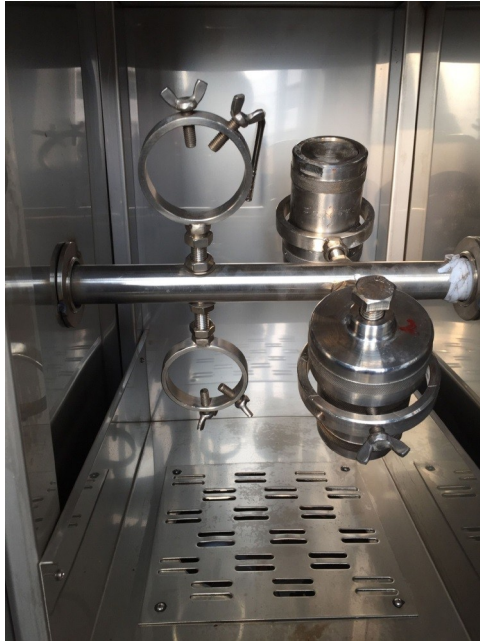

**Figure S2**

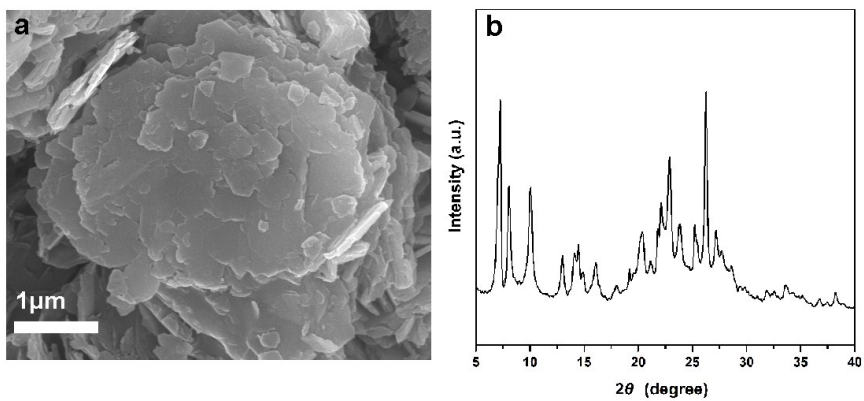

**Figure S3**

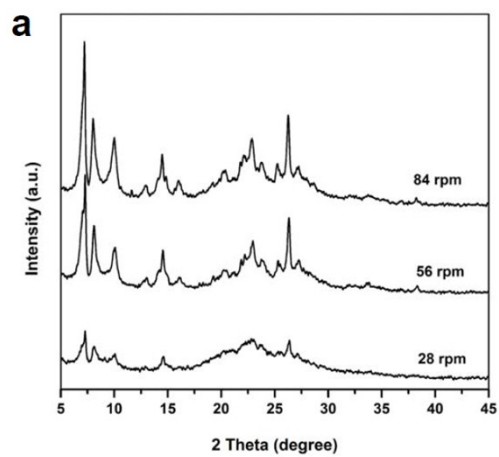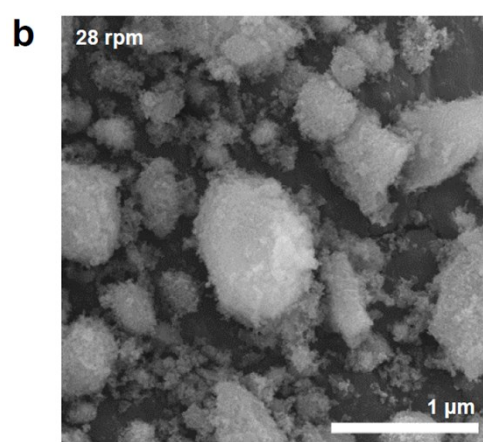

**Figure S4**

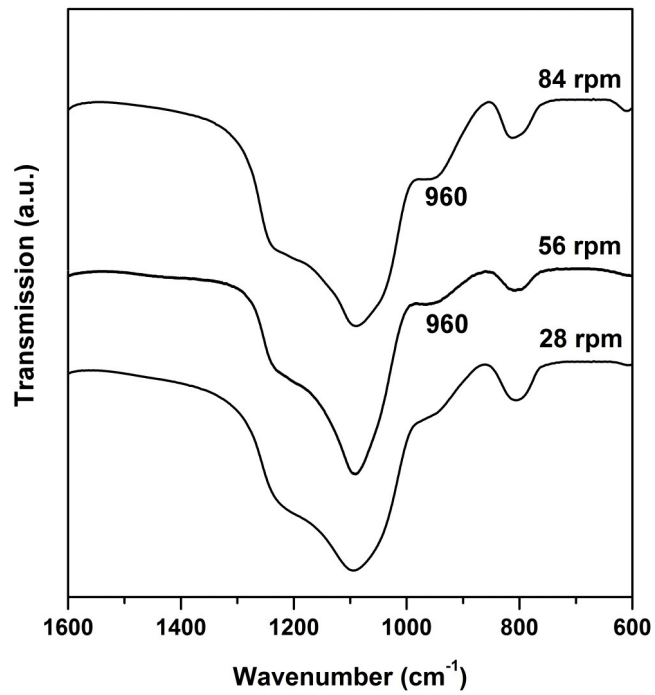

Figure S5

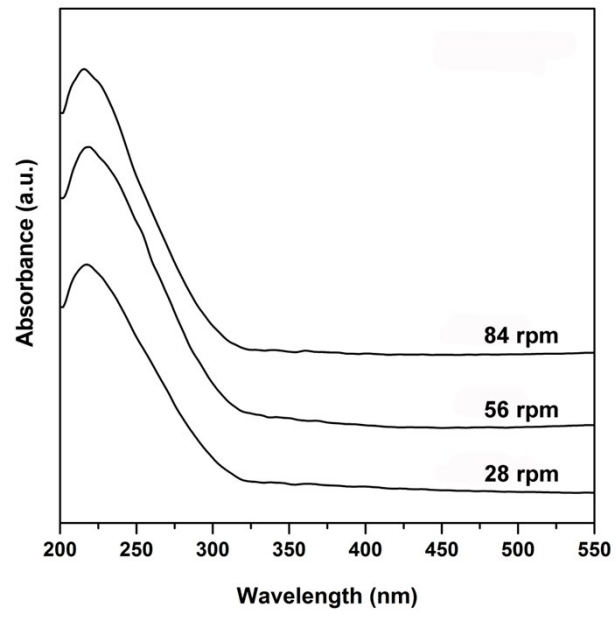

**Figure S6**



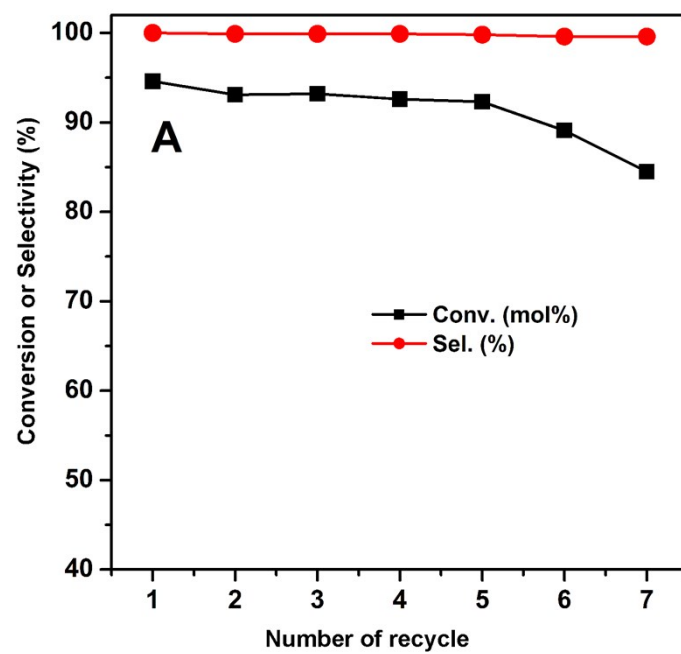

**Figure S7**
